# Supplementary material
Source: PubMed Central journal article supplement (PMC10013483)
Supplement: oop-0008-0221-s01.pdf [file oop-0008-0221-s01.pdf]

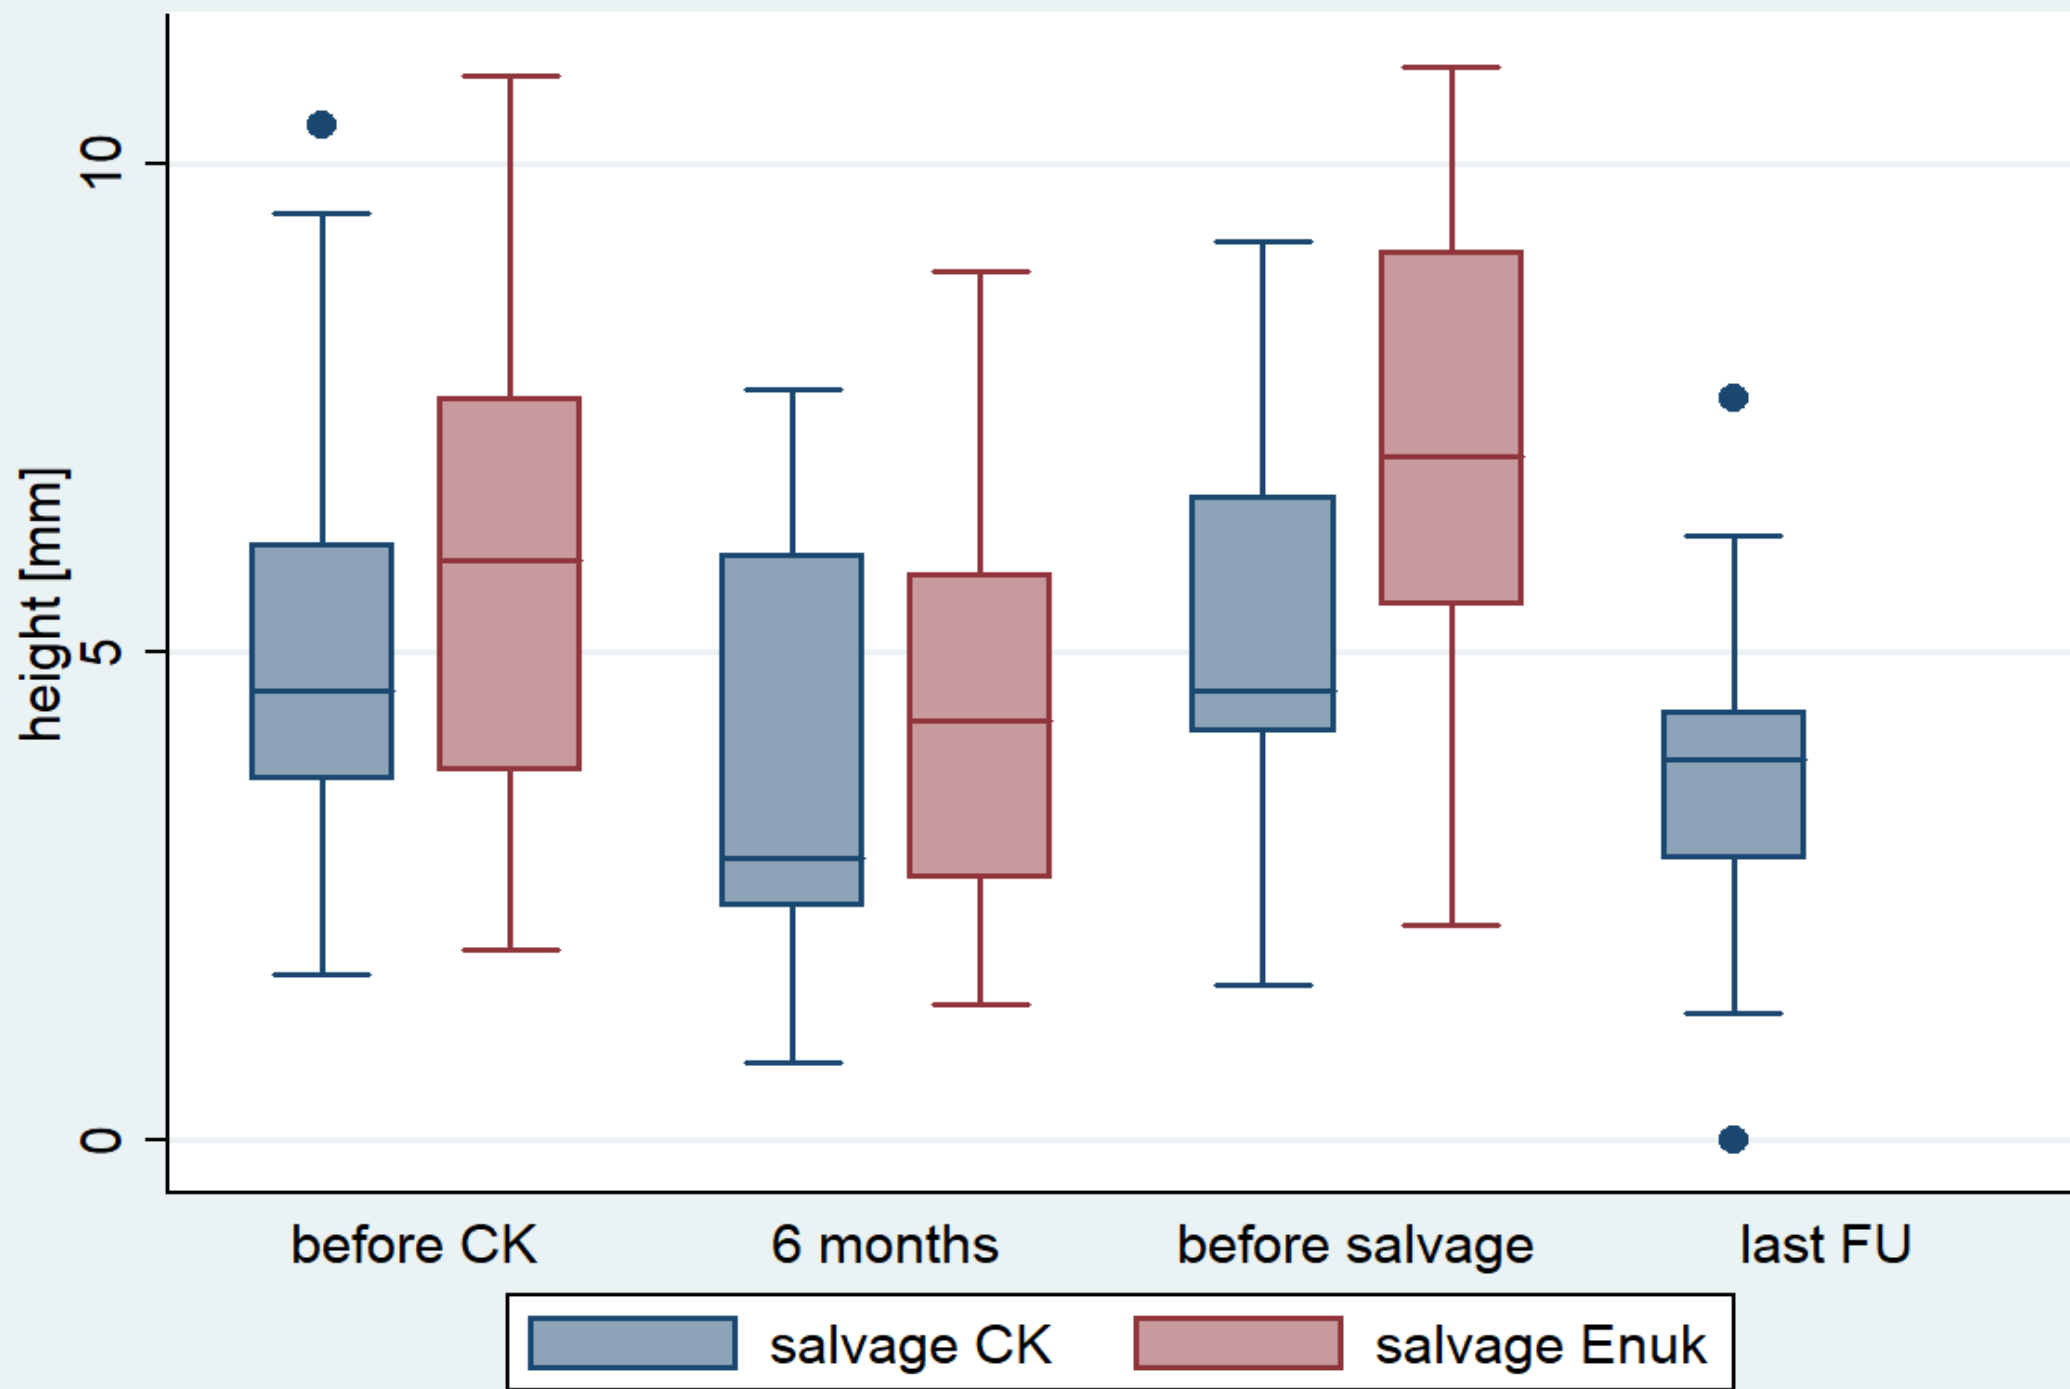

**Supplemental Figure 1** - Development of tumor height (mm) of patients treated with salvage CyberKnife vs. patients treated with salvage enucleation before first treatment, six months post treatment, before salvage treatment and at last follow-up visit.
