# Supplementary material
Source: PubMed Central journal article supplement (PMC10013483)
Supplement: oop-0008-0221-s02.pdf [file oop-0008-0221-s02.pdf]

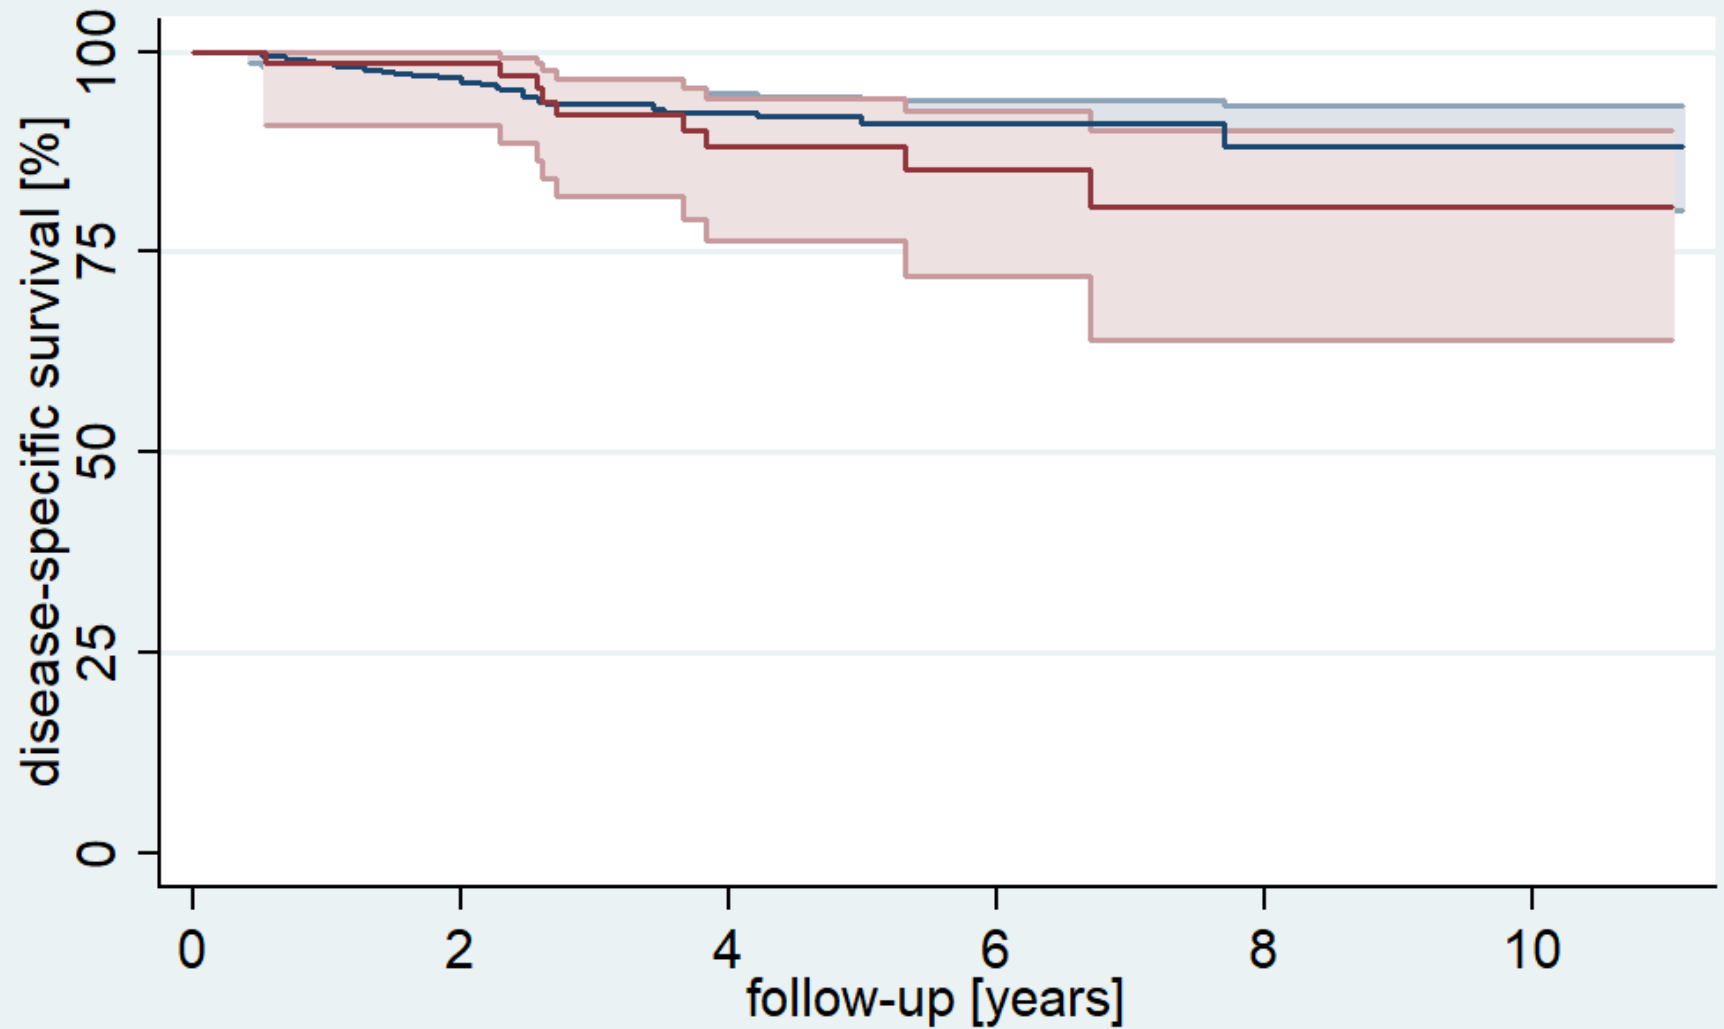

| Number at risk |     | 0   | 2   | 4  | 6  | 8 | 10 |
|----------------|-----|-----|-----|----|----|---|----|
| controlled     | 514 | 325 | 171 | 62 | 26 | 4 |    |
| recurrence     | 74  | 66  | 41  | 20 | 14 | 6 |    |

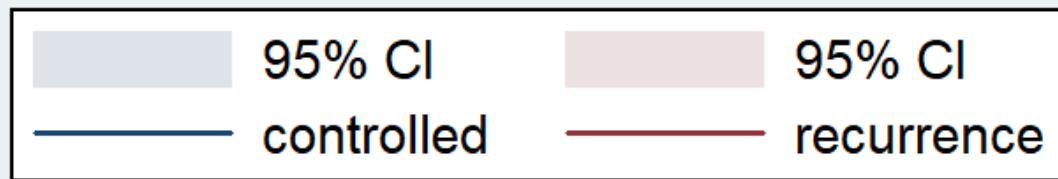

**Supplemental Figure 2** - This figure shows disease-specific survival rates in the recurrence and overall group.
