# Supplementary material
Source: PubMed Central journal article supplement (PMC10013483)
Supplement: oop-0008-0221-s03.pdf [file oop-0008-0221-s03.pdf]

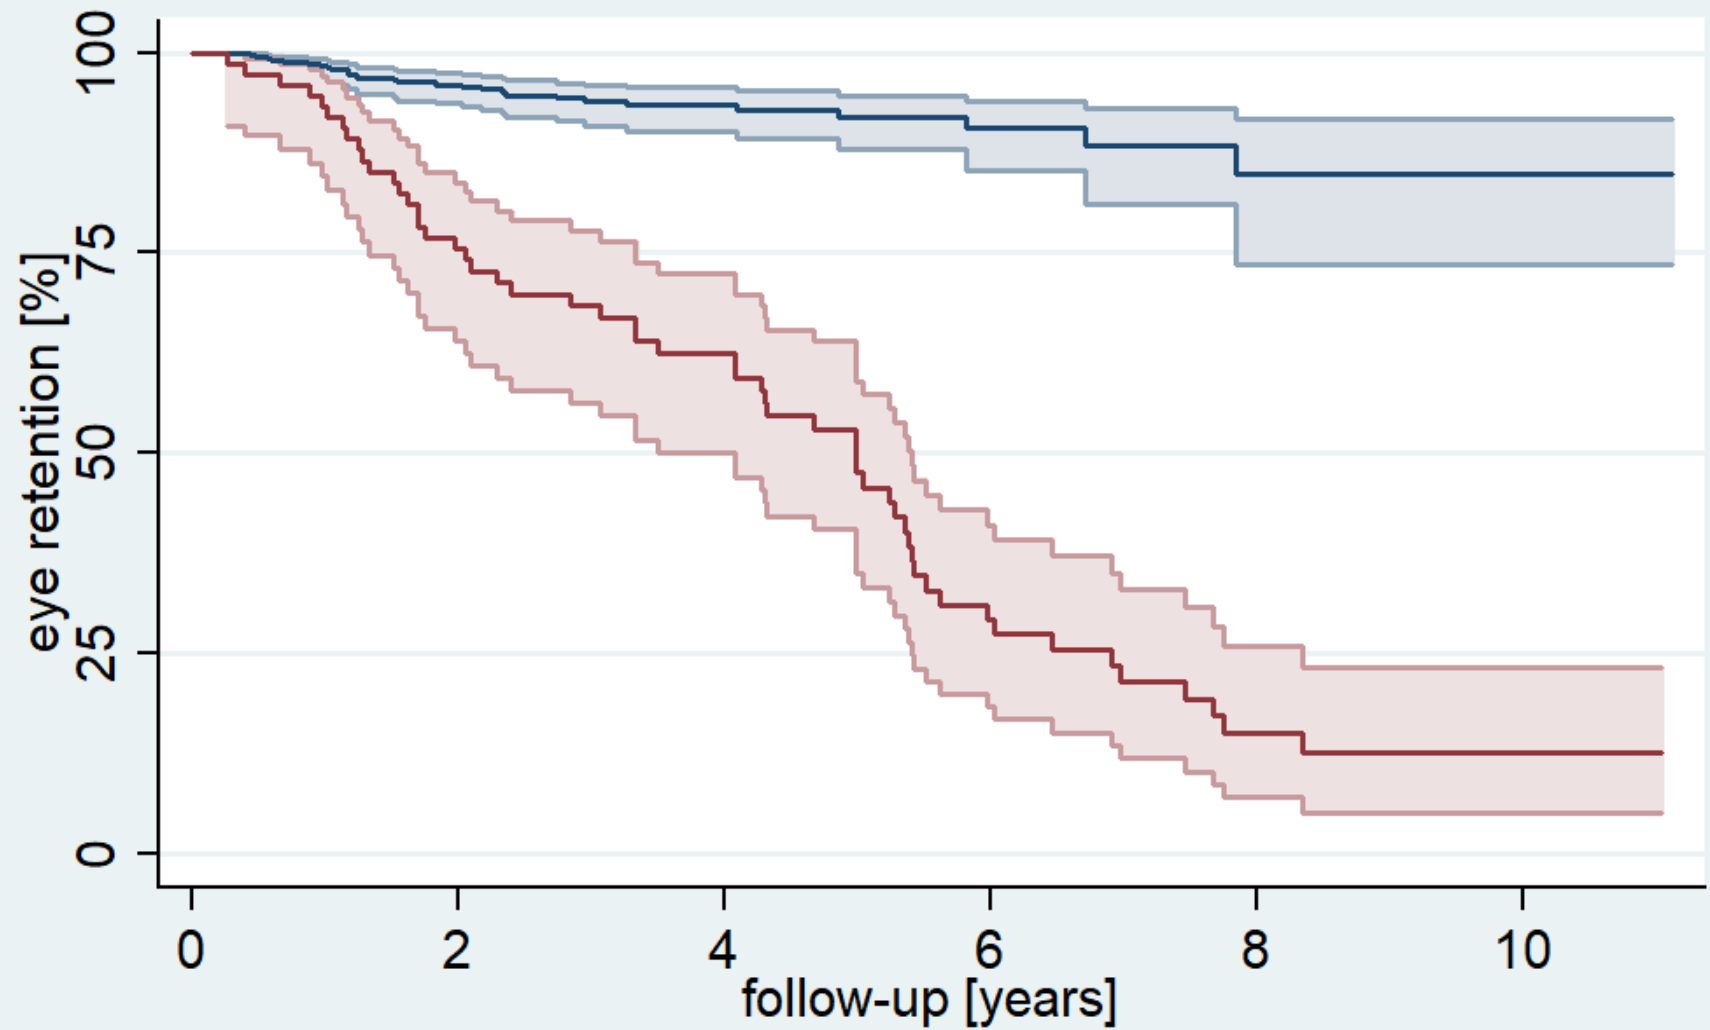

| Number at risk |     | 0   | 2   | 4  | 6  | 8 | 10 |
|----------------|-----|-----|-----|----|----|---|----|
| controlled     | 514 | 316 | 164 | 57 | 23 | 4 |    |
| recurrence     | 74  | 54  | 40  | 16 | 7  | 2 |    |

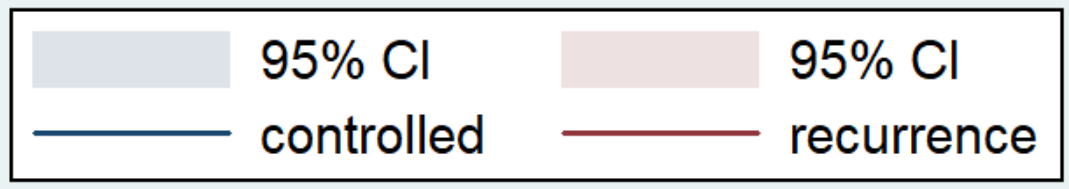

**Supplemental Figure 3** - This figure shows eye retention rates in the recurrence and overall group.
